# Supplementary material
Source: PubMed Central journal article supplement (PMC154313)

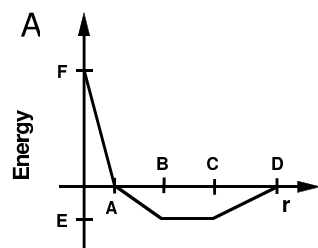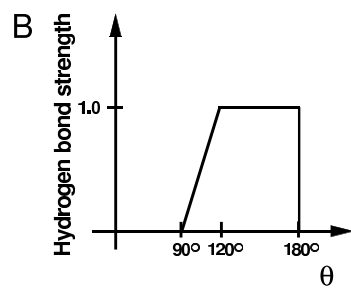

Supplement: pnas_0531373100_2.pdf [file pnas_0531373100_2.pdf]
